# Supplementary material for: Pistachio Consumption Prevents and Improves Lipid Dysmetabolism by Reducing the Lipid Metabolizing Gene Expression in Diet-Induced Obese Mice
Source: PubMed Central journal article supplement (PMC6316241; doi:10.3390/nu10121857), 2018-12-01
Supplement: nutrients-10-01857-s001.pdf [file nutrients-10-01857-s001.pdf]

**TableS1. Composition of mineral mix in STD, HFD and HFD-P.**

| <b>PMIX AIN-93G-MX</b>                 |                      |
|----------------------------------------|----------------------|
| <b>Ingredient (mg/kg)</b>              | <b>4800 g/100 kg</b> |
| Calcium carbonate                      | 6854,40              |
| Potassium phosphate monobasic          | 2700,10              |
| Potassium citrate tribasic monohydrate | 1223,08              |
| Sodium chloride                        | 1395,94              |
| Magnesium oxide                        | 703,34               |
| Potassium sulfate                      | 1004,32              |
| Chromium K sulfate                     | 1,37                 |
| Cupric carbonate                       | 8,26                 |
| Sodium fluoride                        | 1,38                 |
| Potassium iodate                       | 0,28                 |
| Ferric citrate                         | 55,27                |
| Manganese carbonate                    | 14,45                |
| Ammonium molybdate                     | 0,21                 |
| Basic nickel carbonate                 | 0,15                 |
| Lithium chloride                       | 0,14                 |
| Boric acid                             | 0,68                 |
| Ammonium metavanadate                  | 0,14                 |
| Sodium metasilicate                    | 6,88                 |
| Zinc carbonate                         | 45,94                |
| Sodium selenite                        | 0,21                 |

**TableS2. Composition of vitamin mix in STD, HFD and HFD-P.**

| <b>PMIX AIN-93G-VX</b>                                  |                      |
|---------------------------------------------------------|----------------------|
| <b>Ingredient (mg/kg)</b>                               | <b>2100 g/100 kg</b> |
| <b>Vit. K1 phylloquinone 97-103%</b>                    | 1,58 mg/Kg           |
| <b>Nicotinic acid 99,5-100,5%</b>                       | 63,0 mg/Kg           |
| <b>Calcium pantothenate 98-101%</b>                     | 33,6 mg/Kg           |
| <b>Vit. A palmitate 250</b>                             | 8400 I.U./Kg         |
| <b>Biotin 97,5-100,5%</b>                               | 0,42 mg/Kg           |
| <b>Piridoxine 99-101%</b>                               | 14,70 mg/Kg          |
| <b>Riboflavin 97-103%</b>                               | 12,60 mg/Kg          |
| <b>Thiamine 98,5-101%</b>                               | 12,60 mg/Kg          |
| <b>Vit. D3 Cholecalciferol, 500</b>                     | 2100 I.U./Kg         |
| <b>Cyanocobalamin &gt; 0,1%</b>                         | 0,053 mg/Kg          |
| <b>Folic Acid 96-102%</b>                               | 4,16 mg/Kg           |
| <b><math>\alpha</math>-tocopheryl acetate, 500 IU/g</b> | 157,50 mg/Kg         |
